# Supplementary material for: Structural Basis of Oncogenesis by Mutants of Calreticulin
Source: Research Square preprint supplement (doi:10.21203/rs.3.rs-1605601/v1), 2022-05-19
Supplement: Supplementary file 1 [file ef396b411eea3db8c5672e9e.docx]

**Supplementary Figure Legends**

**Supplementary Figure 1**

**A.** Coomassie Blue staining of CALR WT, CALR del52 and indicated derivates. Purified samples were analyzed by SDS-PAGE and stained with Coomassie Blue for total protein detection**. B.** Micro-scale thermophoresis of purified indicated samples. The graphs represent the 350/330 nm intrinsic fluorescence from Trp and Tyr residues at different temperatures. The S-shaped curve is typical of well-folded proteins as the accessibility of Tyr and Trp residues gradually increases upon temperature increases and denaturation. The Tm is computed as the temperature at which half of the proteins in the sample are denatured. **C.** Structure prediction using AlphaFold 2.0 of CALR del52 mutant protein and in particular of the C-terminal new tail. The N-domain is shown in light blue, the P-domain in gree, the partial C-domain of CALR WT in dark blue and the mutant tail in magenta until position 394 and in red from 395 to 411.

**Supplementary Figure 2**

**A.** Fractional deuterium uptake in CALR WT. The scale represents the fractional deuterium uptake as a percentage of theoretical maximum uptake. Regions in dark grey represents regions not covered by detected peptides at the given time point. Shown is the fractional uptake of CALR WT after 1 hour incubation in deuterium (mean of triplicate experiments). The structure was derived from AlphaFold 2.0 database [1] and was validated by structural comparison of published structures of the N- and P-domain of CALR [2, 3]. The structure of 157INKDIRCKDDEF168 is highlighted as the only stretch of the N-domain displaying high hydrogen-deuterium exchange. **B**. Heatmap of the whole calreticulin sequence with fractional deuterium uptake at 0.25, 1, 5, 20 and 60 minutes incubation. The scale represents the deuterium uptake as a percentage of theoretical maximum uptake. Amino acids not covered by detected peptides are not colored. **C.** Butterfly plot of differential deuterium uptake between CALR WT and CALR del52. CALR subdomains are indicated by colored lines. Each grey peak represents the summed deuterium differential for a given amino acids. Standard deviation is shown in grey above and below the X axis. Colored lines represent differential deuterium uptake for individual time points at 0.25 (orange), 1 (red), 5 (cyan), 20 (dark blue) and 60 (black) minutes incubation in deuterium.

**Supplementary Figure 3**

**A.** Deuterium uptake of representative peptides from CALR del52 alone or in complex with TpoR ECD corresponding to the C-terminus of CALR del52 at 5 different exchange time points. The first peptide corresponds to the end of the C-domain common to CALR WT and CALR del52 which does not show differential uptake. The second peptide contains the mutant tail and show high differential uptake. The last peptide corresponds to the last amino acids of the new tail. **B.** Relative deuterium uptake analysis between CALR del52 and CALR del52-TpoR D1D4 complex at 0.25, 1, 5, 20 and 60 minutes incubation in deuterium. Dots indicated in red (deprotected) or blue (protected) show significant differential deuterium intake (p<0.001) with the peptide-level significance testing as described [4]. **C.** Butterfly plot of differential deuterium uptake between CALR del52 and CALR del52-sD1D2D3D4 complex corresponding to Figure 2B. CALR subdomains are indicated by colored lines. Each grey peak represents the summed deuterium differential for a given amino acids. Standard deviation is shown in grey above and below the X axis. Colored lines represent differential deuterium uptake for individual time points at 0.25 (orange), 1 (red), 5 (cyan), 20 (dark blue) and 60 (black) minutes incubation in deuterium. **D.** Left: Theoretical profile of specific versus non-specific interaction in a Donor Saturation Assay (DSA) experiment as per the manufacturer instruction. Right: Donor Saturation Assay of CALR del52 P-C domain or C-domain only. HEK293T were transfected with increasing amount of HaloTag constructs and fixed amount of NanoLuc donor. Negative control consists in an empty NanoLuc vector (n = 4). **E.** STAT5 transcriptional activity with EpoR and indicated CALR truncations. HEK293T were transiently transfected with HA-hEpoR and CALR truncations along with cDNAs coding for STAT5, JAK2 and SpiLuc Firefly luciferase reporter reflecting STAT5 transcriptional activity and normalized with a control reporter (pRLTK) containing Renilla luciferase. Shown are average of 2 independent experiments ( SD) performed in triplicates (N = 2, n = 6). Two-ways ANOVA followed by SIDAK multiple comparison test. ***: p < 0.001, ****: p < 0.0001. **F.** Native western blot of indicated CALR species, with or without reducing agent (DTT). Staining with Coomassie Blue.

**Supplementary Figure 4**

**A.** Coomassie Blue staining of CALR del52-sD1D2 complex after denaturation. Purified samples were analyzed by SDS-PAGE and stained with Coomassie Blue for total protein detection**. B.** Micro-scale thermophoresis of purified indicated samples. The graphs represent the 350/330 nm intrinsic fluorescence from Trp and Tyr residues at different temperatures. The S-shaped curve is typical of well-folded proteins as the accessibility of Tyr and Trp residues gradually increases upon temperature increases and denaturation. The Tm is computed as the temperature at which half of the proteins in the sample are denatured. CALR del52-sD1D2 displays a strong right-shift Tm, indicative of higher stability of the CALR del52-sD1D2 complex compared to CALR del52 alone. **C.** Butterfly plot of differential deuterium uptake between CALR del52 and CALR del52-sD1D2 immature complex corresponding to Figure 3D. CALR subdomains are indicated by colored lines. Each grey peak represents the summed deuterium differential for a given amino acids. Standard deviation is shown in grey above and below the X axis. Colored lines represent differential deuterium uptake for individual time points at 0.25 (orange), 1 (red), 5 (cyan), 20 (dark blue) and 60 (black) minutes incubation in deuterium. **D.** Heatmap of the whole calreticulin sequence with fractional deuterium uptake at 0.25, 1, 5, 20 and 60 minutes incubation. The scale represents the differential deuterium uptake between CALR del52 alone versus the CALR del52-D1D2 complex. Amino acids not covered by detected peptides are not colored. **E.** Relative deuterium uptake analysis between CALR del52 and CALR del52-sD1D2 immature complex at 0.25, 1, 5, 20 and 60 minutes incubation in deuterium. Dots indicated in red (deprotected) or blue (protected) show significant differential deuterium intake (p<0.001) with the peptide-level significance testing as described [4].

**Supplementary Figure 5**

**A.** Molecular Dynamics simulation of TpoR D1D2 domain. The model shows one extensive (S1) and one more restricted (S2) patch of acidic residues represented by meshes in red. Basic residues are shown in blue, acidic residues are shown in red. Complex glycans are attached to position Asn117 and Asn178**. B.** Sequence of CALR del52 mutant tail and mutants as indicated. **C.** STAT5 transcriptional activity with hTpoR and indicated CALR mutants. HEK293T were transiently transfected with HA-hTpoR and CALR mutants along with cDNAs coding for STAT5, JAK2 and SpiLuc Firefly luciferase reporter reflecting STAT5 transcriptional activity and normalized with a control reporter (pRLTK) containing Renilla luciferase. Shown are average 3 independent experiments ( SD) performed in triplicates (N = 3, n = 9). Two-ways ANOVA followed by SIDAK multiple comparison test. ****: p < 0.0001. ns: non-significant. **D**. Relative deuterium uptake analysis between TpoR D1D4 and TpoR D1D4-CALR del52 complex at 0.25, 1, 5, 20 and 60 minutes incubation in deuterium. Dots indicated in red (deprotected) or blue (protected) show significant differential deuterium intake (p<0.001) with the peptide-level significance testing as described [4].

1. Jumper, J., et al., *Highly accurate protein structure prediction with AlphaFold.* Nature, 2021.

2. Chouquet, A., et al., *X-ray structure of the human calreticulin globular domain reveals a peptide-binding area and suggests a multi-molecular mechanism.* PloS one, 2011. **6**(3): p. e17886-e17886.

3. Ellgaard, L., et al., *NMR structure of the calreticulin P-domain.* Proceedings of the National Academy of Sciences, 2001. **98**(6): p. 3133-3138.

4. Lau, A.M., et al., *Deuteros 2.0: peptide-level significance testing of data from hydrogen deuterium exchange mass spectrometry.* Bioinformatics, 2021. **37**(2): p. 270-272.
